# Supplementary material
Source: MDPI journal article supplement (https://www.mdpi.com/2227-9717/12/4/817)
Supplement: s1 [file s1]

**Table S1.** Composition of pyrolysis tars determined by GC-MS (%area)

|                                                                   | Tar<br>RH | Tar<br>ZW | Tar<br>PW |
|-------------------------------------------------------------------|-----------|-----------|-----------|
| Acids                                                             | 4.16      | 2.27      | 2.37      |
| Acetic acid                                                       | 3.99      | 1.57      | 1.59      |
| Propanoic acid                                                    | 0.17      | 0.25      | 0.25      |
| 4-Ethylbenzoic acid                                               | 0.00      | 0.45      | 0.53      |
| Aldehydes                                                         | 0.37      | 0.00      | 0.00      |
| Succindialdehyde                                                  | 0.37      | 0.00      | 0.00      |
| Ketones                                                           | 10.27     | 6.72      | 5.87      |
| Hydroxyacetone                                                    | 1.77      | 0.00      | 0.16      |
| 1-Hydroxy-2-butanone                                              | 0.43      | 0.00      | 0.00      |
| Cyclopentanone                                                    | 0.09      | 0.00      | 0.00      |
| 2-Cyclopenten-1-one                                               | 0.00      | 0.61      | 0.00      |
| 3-Methyl-2-hexanone                                               | 0.35      | 0.00      | 0.00      |
| 1-(Acetyloxy)-2-propanone                                         | 0.96      | 0.18      | 0.20      |
| 2-Methyl-2-cyclopenten-1-one                                      | 0.43      | 0.54      | 0.56      |
| 1,2-Cyclopentanedione                                             | 0.86      | 0.00      | 0.00      |
| 2,5-Hexanedione                                                   | 0.17      | 0.00      | 0.00      |
| 3-Methyl-2-cyclopenten-1-one                                      | 0.82      | 1.05      | 1.18      |
| 3,4-Dimethyl-2-cyclopenten-1-one                                  | 0.20      | 0.11      | 0.10      |
| 3-Methyl-1,2-cyclopentanedione                                    | 1.89      | 0.91      | 0.89      |
| 2,3-Dimethyl-2-cyclopenten-1-one                                  | 0.38      | 0.55      | 0.65      |
| Acetophenone                                                      | 0.00      | 0.24      | 0.22      |
| 3-Ethyl-2-cyclopenten-1-one                                       | 0.00      | 0.49      | 0.45      |
| 3-Etil-2-hidroxi-2-ciclopenten-1-ona                              | 0.50      | 0.21      | 0.14      |
| 2,3-Dihydro-1H-inden-1-one                                        | 0.40      | 0.68      | 0.73      |
| 9H-Fluoren-9-one                                                  | 0.00      | 0.20      | 0.16      |
| 3,3-Dimethyl-2-butanone                                           | 0.34      | 0.00      | 0.00      |
| 2,3,4-Trimethyl-2-cyclopenten-1-one                               | 0.00      | 0.09      | 0.00      |
| 4-(1-Methylethyl)-2-cyclohexen-1-one                              | 0.28      | 0.00      | 0.00      |
| 1-(3,5-Dimethoxyphenyl)-ethanone                                  | 0.40      | 0.39      | 0.00      |
| Spiro[2.4]heptan-4-one                                            | 0.00      | 0.47      | 0.43      |
| Esters                                                            | 1.32      | 0.52      | 0.58      |
| Propanoic acid, ethenyl ester                                     | 0.00      | 0.13      | 0.11      |
| Methyl acetate                                                    | 0.34      | 0.00      | 0.00      |
| Butanoic acid, 2-propenyl ester                                   | 0.49      | 0.00      | 0.00      |
| Isopropyl hexanoate                                               | 0.26      | 0.39      | 0.47      |
| 3-[4-(Acetyloxy)-3-methoxyphenyl]- 2-propenoic acid, methyl ester | 0.23      | 0.00      | 0.00      |
| Ethers                                                            | 1.19      | 5.83      | 5.27      |
| 1-Ethoxy-4-ethyl-benzene                                          | 0.00      | 0.41      | 0.56      |
| 1-Methoxy-2-(methoxymethyl)-benzene                               | 0.00      | 0.34      | 0.26      |

|                                              |       |       |       |
|----------------------------------------------|-------|-------|-------|
| 1,2,3-Trimethoxybenzene                      | 0.54  | 3.35  | 3.26  |
| 1,2,3-Trimethoxy-5-methylbenzene             | 0.65  | 1.73  | 1.19  |
| Furans                                       | 11.41 | 2.85  | 3.38  |
| 2(5H)-Furanone                               | 0.70  | 0.07  | 0.14  |
| 5-Methyl-2(5H)-furanone                      | 0.21  | 0.00  | 0.00  |
| 5-Methyl-furfural                            | 0.51  | 0.29  | 0.48  |
| 3-Methyl-2(5H)-furanone                      | 0.35  | 0.30  | 0.32  |
| 3-Hydroxydihydro-2(3H)-furanone              | 0.22  | 0.00  | 0.00  |
| 2,3-Benzofuran                               | 0.00  | 0.00  | 0.18  |
| 4-Methyl-2(5H)-furanone                      | 0.22  | 0.16  | 0.23  |
| 2,3-Dimethyl-2(5H)-furanone                  | 0.32  | 0.00  | 0.00  |
| 2-Methylbenzofuran                           | 0.00  | 0.00  | 0.10  |
| 5-(Hydroxymethyl)dihydro-2(3H)-furanone      | 0.40  | 0.00  | 0.00  |
| 2,3-Dihydrobenzofuran                        | 6.46  | 0.91  | 0.85  |
| 5-Hydroxymethylfurfural                      | 0.85  | 0.00  | 0.00  |
| Dibenzofuran                                 | 0.00  | 0.58  | 0.57  |
| 1-(2-Furanyl)-ethanone                       | 0.67  | 0.54  | 0.51  |
| 3,5-Dimethyl-2(5H)-furanone                  | 0.50  | 0.00  | 0.00  |
| Pyrans                                       | 0.80  | 0.53  | 0.28  |
| 3-Hydroxy-2-methyl-4H-pyran-4-one            | 0.69  | 0.00  | 0.00  |
| 7-Hydroxy-2H-1-benzopyran-2-one              | 0.11  | 0.00  | 0.00  |
| 6,7-Dimethoxy-2H-1-benzopyran-2-one          | 0.00  | 0.53  | 0.28  |
| Alcohols and sugars                          | 5.03  | 2.60  | 4.68  |
| 3-Furanmethanol                              | 1.45  | 0.33  | 0.39  |
| Tetrahydro-2-furanmethanol                   | 0.29  | 0.00  | 0.00  |
| Cyclopropanemethanol                         | 1.08  | 0.00  | 0.00  |
| 2-Methyl-1-pentanol                          | 0.13  | 0.00  | 0.00  |
| 1H-Indenol                                   | 0.00  | 0.49  | 0.46  |
| 1,4:3,6-Dianhydro- $\alpha$ -D-glucopyranose | 0.00  | 0.59  | 0.56  |
| 2,3-Anhydro-D-mannosan                       | 0.46  | 0.00  | 0.32  |
| 1,6-Anhydro- $\beta$ -D-glucopyranose        | 1.62  | 1.19  | 2.95  |
| Phenols                                      | 52.57 | 60.67 | 60.66 |
| Alkylated phenols                            | 24.89 | 32.61 | 36.52 |
| Phenol                                       | 4.15  | 4.59  | 5.30  |
| 2-Methylphenol                               | 1.71  | 3.01  | 3.46  |
| 4-Methylphenol                               | 4.24  | 5.95  | 6.56  |
| 2,6-Dimethylphenol                           | 0.00  | 0.65  | 0.73  |
| 2-Ethylphenol                                | 0.29  | 0.53  | 0.61  |
| 2,4-Dimethylphenol                           | 0.75  | 1.67  | 2.28  |
| 2,5-Dimethylphenol                           | 0.59  | 0.65  | 0.72  |
| 4-Ethylphenol                                | 4.56  | 3.22  | 3.28  |
| 3,4-Dimethylphenol                           | 0.00  | 0.37  | 0.40  |
| 3,5-Dimethylphenol                           | 0.48  | 0.00  | 0.00  |
| 2,3-Dimethylphenol                           | 0.12  | 0.34  | 0.37  |

|                                               |       |       |       |
|-----------------------------------------------|-------|-------|-------|
| 1,2-Dihydroxybenzene                          | 2.77  | 1.58  | 2.25  |
| 3-(1-Methylethyl)-phenol                      | 0.00  | 0.56  | 0.69  |
| 2-Ethyl-5-methylphenol                        | 0.53  | 1.20  | 1.26  |
| 3-Ethyl-5-methylphenol                        | 0.00  | 0.00  | 0.31  |
| 3-Methyl-1,2-benzenediol                      | 1.39  | 0.97  | 1.15  |
| 2,4,6-Trimethylphenol                         | 0.00  | 0.00  | 0.43  |
| 2,3,5-Trimethylphenol                         | 0.00  | 0.20  | 0.14  |
| 1,4-Benzenediol                               | 0.85  | 0.35  | 0.29  |
| 4-Methyl-1,2-benzenediol                      | 0.83  | 1.06  | 1.60  |
| 5-Methyl-2-(1-methylethyl)-phenol             | 0.00  | 0.38  | 0.00  |
| 2-Methyl-5-(1-methylethyl)-phenol             | 0.00  | 0.80  | 0.55  |
| 2-(2-Propenyl)-phenol                         | 0.00  | 0.19  | 0.00  |
| 4-(2-Propenyl)-phenol                         | 0.00  | 0.38  | 0.77  |
| 2-Methyl-1,4-benzenediol                      | 0.98  | 0.32  | 0.00  |
| 4-Ethyl-1,2-benzenediol                       | 0.40  | 1.39  | 1.56  |
| 1-(3-Hydroxyphenyl)-ethanone                  | 0.00  | 0.42  | 0.29  |
| 2-Methyl-6-(2-propenyl)-phenol                | 0.00  | 0.62  | 0.63  |
| 3-Hydroxybiphenyl                             | 0.00  | 0.26  | 0.18  |
| 4-Hydroxybiphenyl                             | 0.00  | 0.39  | 0.28  |
| Methyl (2E)-3-(4-Hydroxyphenyl)-prop-2-enoate | 0.11  | 0.00  | 0.00  |
| Methyl 3-(4-Hydroxyphenyl)-propionate         | 0.14  | 0.00  | 0.00  |
| 2-(1-Methylpropyl)-phenol                     | 0.00  | 0.17  | 0.00  |
| 4-Propylresorcinol                            | 0.00  | 0.39  | 0.00  |
| 4-Hexylresorcinol                             | 0.00  | 0.00  | 0.43  |
| Phenolic ethers                               | 27.68 | 28.06 | 24.14 |
| 2-Methoxyphenol                               | 4.27  | 2.76  | 3.16  |
| 2-Methoxy-5-methylphenol                      | 0.19  | 0.19  | 0.23  |
| 2-Methoxy-4-methylphenol                      | 3.82  | 2.84  | 4.11  |
| 2-Methoxy-1,4-benzenediol                     | 0.53  | 0.46  | 0.00  |
| 4-Ethyl-2-methoxyphenol                       | 3.29  | 1.66  | 1.94  |
| 2-Methoxy-4-vinylphenol                       | 2.68  | 0.00  | 0.00  |
| 2,6-Dimethoxyphenol                           | 2.20  | 5.55  | 3.85  |
| 2-Methoxy-4-(2-propenyl)-phenol               | 1.64  | 1.79  | 1.59  |
| 2-Methoxy-4-propylphenol                      | 0.86  | 0.36  | 0.37  |
| 3-Hydroxy-4-methoxybenzaldehyde               | 1.24  | 0.90  | 0.70  |
| cis-2-Methoxy-4-propenylphenol                | 0.73  | 0.78  | 0.74  |
| trans-2-Methoxy-4-propenylphenol              | 2.58  | 2.00  | 2.26  |
| 1-(4-Hydroxy-3-methoxyphenyl)-ethanone        | 0.00  | 0.81  | 0.00  |
| 1-(4-Hydroxy-3-methoxyphenyl)-2-propanone     | 1.35  | 1.01  | 0.81  |
| 4-(4-Hydroxy-3-methoxyphenyl)-2-butanone      | 0.34  | 0.00  | 0.73  |
| 2,6-Dimethoxy-4-(2-propenyl)-phenol           | 0.78  | 4.03  | 1.71  |
| 4-Hydroxy-3,5-dimethoxybenzaldehyde           | 0.00  | 0.86  | 0.42  |
| 1-(4-Hydroxy-3,5-dimethoxyphenyl)-ethanone    | 0.44  | 0.78  | 0.52  |
| 4-Hydroxy-2-methoxycinnamaldehyde             | 0.40  | 0.00  | 0.00  |

|                                               |       |      |      |
|-----------------------------------------------|-------|------|------|
| 1-(4-Hydroxy-3,5-dimethoxyphenyl)-1-propanone | 0.00  | 0.24 | 0.28 |
| 1-(2,6-Dihydroxy-4-methoxyphenyl)-1-butanone  | 0.17  | 0.63 | 0.39 |
| (E)-3,3'-Dimethoxy-4,4'-dihydroxystilbene     | 0.17  | 0.41 | 0.33 |
| Hydrocarbons                                  | 0.12  | 8.31 | 8.84 |
| p-xylene                                      | 0.12  | 0.00 | 0.00 |
| Indene                                        | 0.00  | 0.23 | 0.41 |
| cis-1,4-Dimethyl-2-methylenecyclohexane       | 0.00  | 0.22 | 0.00 |
| 2-Methyl-1H-indene                            | 0.00  | 0.00 | 0.11 |
| Naphthalene                                   | 0.00  | 0.49 | 1.10 |
| 1-Methylnaphthalene                           | 0.00  | 0.00 | 0.44 |
| 2-Methylnaphthalene                           | 0.00  | 0.36 | 0.80 |
| Acenaphthylene                                | 0.00  | 0.83 | 0.94 |
| 9H-Fluorene                                   | 0.00  | 0.51 | 0.37 |
| Phenanthrene                                  | 0.00  | 1.97 | 2.06 |
| 1-Methylphenanthrene                          | 0.00  | 0.28 | 0.18 |
| 9-Methylanthracene                            | 0.00  | 0.38 | 0.32 |
| 4,5-Methylene-phenanthrene                    | 0.00  | 0.56 | 0.00 |
| 2-Phenylnaphthalene                           | 0.00  | 0.42 | 0.32 |
| 1,2-(1,8-naphthalene)benzene                  | 0.00  | 0.63 | 0.54 |
| Pyrene                                        | 0.00  | 1.00 | 0.77 |
| Triphenylene                                  | 0.00  | 0.43 | 0.36 |
| 1,1a,6,6a-Tetrahydrocycloprop[a]indene        | 0.00  | 0.00 | 0.12 |
| Others                                        | 1.94  | 0.00 | 0.76 |
| 1,3-Dimethylpyrazole                          | 1.73  | 0.00 | 0.76 |
| 1H-Pyrrole-2-carboxaldehyde                   | 0.12  | 0.00 | 0.00 |
| 2-[(Methylamino)methyl]cyclohexanol           | 0.09  | 0.00 | 0.00 |
| Unknown                                       | 10.82 | 9.70 | 7.31 |
